# Supplementary material
Source: PubMed Central journal article supplement (PMC3684707)
Supplement: NIHMS397452-supplement-1.pdf [file NIHMS397452-supplement-1.pdf]

| Agilent Probe | entrezid | symbol    | direction | median_young    | median_ol d |
|---------------|----------|-----------|-----------|-----------------|-------------|
| A_23_P19095   | 28966    | SNX24     | -1        | -1.02775        | -0.392      |
| A_24_P933580  | 89797    | NAV2      | -1        | 0.3922 1.483    |             |
| A_24_P23445   | NA       | NA        | 1         | 0.807 0.112     |             |
| A_23_P123608  | 3717     | JAK2      | -1        | 0.225 0.87      |             |
| A_23_P77572   | 8663     | EI F3C    | 1         | -0.27375        | -0.96       |
| A_32_P112331  | 5337     | PLD1      | -1        | -1.58475        | -0.696      |
| A_23_P126836  | 7292     | TNFSF4    | -1        | -1.402 -0.667   |             |
| A_24_P3005    | 6335     | SCN9A     | -1        | -0.064 0.83     |             |
| A_23_P87952   | 6660     | SOX5      | -1        | -0.5915 0.131   |             |
| A_23_P412707  | 122616   | C14orf79  | 1         | 0.0665          | -0.785      |
| A_32_P358264  | 149351   | LOC149351 | -1        | -0.6275         | -0.031      |
| A_23_P134484  | 799      | CALCR     | -1        | -4.0505 -1.977  |             |
| A_32_P17765   | 55366    | LGR4      | 1         | 1.055 0.139     |             |
| A_24_P918436  | 1454     | CSNK1E    | 1         | 0.65 -0.091     |             |
| A_23_P47148   | 50507    | NOX4      | -1        | -0.0505 1.787   |             |
| A_23_P136573  | 8869     | ST3GAL5   | -1        | -0.31 0.224     |             |
| A_23_P161595  | 2011     | MARK2     | 1         | 0.4415 -0.31    |             |
| A_23_P354694  | 8840     | WISP1     | -1        | -1.0305 -0.441  |             |
| A_24_P102082  | 5136     | PDE1A     | -1        | -0.214 0.7585   |             |
| A_24_P97465   | 1154     | CISH      | 1         | 0.245 -0.3689   |             |
| A_24_P921232  | 5195     | PEX14     | -1        | -0.122 0.493    |             |
| A_23_P164057  | 4239     | MFAP4     | -1        | 1.3775 2.125    |             |
| A_24_P208825  | 4585     | MUC4      | 1         | 0.575277778     | -0.411      |
| A_24_P739344  | 50507    | NOX4      | -1        | 0.231 1.804     |             |
| A_24_P145629  | 347735   | SERINC2   | 1         | 0.213 -0.661    |             |
| A_23_P113005  | 1942     | EFNA1     | 1         | 0.6565 0.061    |             |
| A_23_P88249   | 55147    | RBM23     | 1         | 0.079222222     | -0.6122     |
| A_32_P71788   | 2288     | FKBP4     | 1         | -1.34325        | -2.371      |
| A_23_P206169  | 146057   | TTBK2     | -1        | -0.9235 -0.35   |             |
| A_23_P27279   | 23327    | NEDD4L    | 1         | -1.1455 -1.7405 |             |
| A_23_P44836   | 64943    | NT5DC2    | 1         | -0.893 -1.974   |             |
| A_24_P916927  | 8526     | DGKE      | -1        | -1.217 -0.612   |             |
| A_24_P32920   | 286467   | LOC286467 | 1         | -0.5945         | -1.086      |
| A_23_P79272   | 5136     | PDE1A     | -1        | -0.256 0.845    |             |
| A_24_P321581  | 55089    | SLC38A4   | -1        | -1.913 -1.3755  |             |
| A_23_P123732  | 414328   | C9orf103  | -1        | 1.14065         | 1.74        |
| A_24_P49731   | 4801     | NFYB      | -1        | -1.019 -0.312   |             |
| A_23_P112634  | 201895   | C4orf34   | -1        | -0.1835 0.306   |             |
| A_23_P61778   | 64359    | NXN       | 1         | 0.553 -0.657    |             |
| A_23_P17095   | 7035     | TFPI      | -1        | -0.738 0.057    |             |
| A_23_P43095   | 79776    | ZFHX4     | -1        | 1.8285 2.279    |             |
| A_24_P110967  | 115294   | PCMTD1    | -1        | 1.59671875      | 2.1         |
| A_23_P371284  | 353141   | LCE2D     | 1         | 1.4675 0.755    |             |
| A_23_P57961   | 5364     | PLXNB1    | 1         | 0.733 -0.326    |             |
| A_23_P419602  | 6721     | SREBF2    | 1         | -0.6575 -1.27   |             |
| A_23_P77073   | 84888    | SPPL2A    | -1        | -0.8145 -0.014  |             |
| A_24_P102283  | 9839     | ZEB2      | -1        | 1.0375 2.285    |             |
| A_24_P203056  | 605      | BCL7A     | 1         | 0.1415 -0.463   |             |
| A_23_P140725  | 9742     | IFT140    | 1         | 0.352 -0.1805   |             |
| A_23_P117635  | 4287     | ATXN3     | -1        | 0.0845 0.61     |             |
| A_23_P105923  | 1735     | DI O3     | -1        | 0.742 1.766     |             |
| A_23_P200325  | 9910     | RABGAP1L  | -1        | 0.735           | 1.37        |
| A_23_P85004   | 1730     | DI APH2   | -1        | 0.355 0.983     |             |
| A_24_P353300  | 3985     | LI MK2    | 1         | 0.469 -0.135    |             |
| A_24_P410453  | 23345    | SYNE1     | -1        | 1.4745 2.287    |             |
| A_32_P49844   | 23433    | RHOQ      | -1        | 1.883 2.61      |             |
| A_23_P387856  | 23327    | NEDD4L    | 1         | -1.0865 -1.532  |             |
| A_24_P263259  | 317762   | CCDC85C   | 1         | -0.955 -1.839   |             |
| A_32_P38145   | 11252    | PACSI N2  | 1         | 0.2835 -0.563   |             |
| A_32_P532216  | 5859     | QARS      | 1         | 0.0655 -0.3925  |             |
| A_24_P84668   | 27145    | FILIP1    | -1        | 2.87 3.739      |             |
| A_23_P89910   | 79760    | GEMIN7    | 1         | -0.458 -0.919   |             |

|              |           | Suppl emental Tabl e1 |    |              |             |
|--------------|-----------|-----------------------|----|--------------|-------------|
| A_24_P264994 | 100129397 | LOC100129397          | -1 | 0.5575       | 2.123       |
| A_32_P129419 | 79664     | NARG2                 | -1 | 0.1545       | 0.778       |
| A_24_P94034  | 23326     | USP22                 | 1  | -0.370277778 | -1.117      |
| A_23_P7596   | 4651      | MY010                 | 1  | -1.1245      | -1.828      |
| A_23_P35030  | 54973     | CPSF3L                | 1  | 0.3475       | -0.223      |
| A_23_P311869 | 8869      | ST3GAL5               | -1 | -0.324       | 0.144       |
| A_23_P38567  | 92521     | SPECC1                | -1 | -0.83        | 0.243       |
| A_23_P22460  | 331       | XIAP                  | -1 | -0.01055     | 0.7955      |
| A_24_P211558 | 23598     | PATZ1                 | 1  | 0.376        | -0.573      |
| A_23_P112289 | 7111      | TMOD1                 | -1 | -0.128       | 0.6365      |
| A_23_P39088  | NA        | NA                    | 1  | -1.236       | -1.903      |
| A_32_P75581  | 27319     | BHLHE22               | -1 | 2.81         | 3.74        |
| A_24_P343271 | 55005     | RMND1                 | -1 | -0.7555      | -0.204      |
| A_23_P112548 | 81932     | HDHD3                 | 1  | 0.44         | -0.106      |
| A_23_P304287 | 5701      | PSMC2                 | -1 | -0.9395      | -0.266      |
| A_23_P102611 | 8839      | WI SP2                | -1 | 0.6          | 1.915       |
| A_23_P26810  | 7157      | TP53                  | 1  | -0.16        | -0.97       |
| A_24_P208442 | 5136      | PDE1A                 | -1 | -0.556875    | 0.598       |
| A_23_P80377  | 11252     | PACSI N2              | 1  | 0.15         | -0.663      |
| A_24_P911676 | 6659      | SOX4                  | 1  | 0.095        | -1.144      |
| A_24_P200603 | 84105     | PCBD2                 | -1 | -0.85        | -0.197      |
| A_23_P56170  | 10025     | MED16                 | 1  | 0.0155       | -0.832      |
| A_23_P213745 | 9547      | CXCL14                | -1 | 3.0275       | 4.114       |
| A_23_P168479 | 5898      | RALA                  | -1 | -0.547       | -0.007      |
| A_23_P81507  | 2196      | FAT2                  | 1  | 1.1895       | 0.24        |
| A_24_P193435 | 7082      | TJP1                  | -1 | 1.2495       | 1.684       |
| A_23_P129031 | 4287      | ATXN3                 | -1 | -1.335       | -0.631      |
| A_23_P378526 | 51750     | RTEL1                 | 1  | -0.4205      | -0.953      |
| A_23_P55342  | 1856      | DVL2                  | 1  | -0.252       | -0.6505     |
| A_24_P521409 | 6198      | RPS6KB1               | -1 | -2.117       | -1.496      |
| A_24_P516215 | 28987     | NOB1                  | 1  | -0.85825     | -1.455      |
| A_24_P212851 | 6597      | SMARCA4               | 1  | -1.29325     | -1.97       |
| A_24_P340428 | 23200     | ATP11B                | -1 | -0.50125     | 0.124       |
| A_23_P71790  | 158056    | MAMDC4                | 1  | -0.148       | -0.631      |
| A_23_P56494  | 151258    | SLC38A11              | -1 | -0.62825     | 0.184       |
| A_23_P27265  | 92126     | DSEL                  | -1 | -0.621       | 0.229       |
| A_24_P49199  | 342035    | GLDN                  | -1 | 2.3655       | 3.368       |
| A_23_P345692 | 53342     | IL17D                 | -1 | 0.4765       | 1.189       |
| A_24_P140405 | 9508      | ADAMTS3               | -1 | -0.937       | 0.023       |
| A_32_P119033 | 345557    | PLCXD3                | -1 | 2.025055556  | 2.861       |
| A_24_P300021 | 6474      | SHOX2                 | -1 | -0.0305      | 0.833       |
| A_32_P12232  | 54796     | BNC2                  | -1 | 0.0485       | 0.731       |
| A_24_P511877 | 647121    | EMBP1                 | -1 | -1.3525      | 0.138       |
| A_32_P163125 | 259230    | SGMS1                 | -1 | 0.2715       | 1.133       |
| A_23_P77818  | 10476     | ATP5H                 | -1 | -0.207       | 0.213333333 |
| A_23_P50942  | 22930     | RAB3GAP1              | -1 | -1           | 0.21225     |
| A_23_P121722 | 55714     | ODZ3                  | -1 | -0.7925      | 0.497       |
| A_24_P367289 | 780       | DDR1                  | 1  | 0.061        | -1.342      |
| A_23_P136135 | 1119      | CHKA                  | 1  | -0.7805      | -1.438      |
| A_23_P149545 | 8349      | HIST2H2BE             | 1  | -1.1235      | -1.7        |
| A_23_P36928  | 51082     | POLR1D                | 1  | -0.9275      | -1.442      |
| A_23_P134426 | 10457     | GPNMB                 | -1 | 0.462        | 1.497       |
| A_24_P157388 | 55573     | CDV3                  | -1 | -0.54775     | 0.3789      |
| A_23_P16139  | 10523     | CHERP                 | 1  | -0.2985      | -0.8375     |
| A_23_P218817 | 1375      | CPT1B                 | 1  | 0.771        | 0.198       |
| A_23_P363255 | 80323     | CCDC68                | -1 | 0.294        | 1.206       |
| A_23_P320739 | 4208      | MEF2C                 | -1 | 1.32         | 2.148       |
| A_23_P257609 | 6159      | RPL29                 | 1  | -0.0495      | -0.522      |
| A_24_P376441 | 27097     | TAF5L                 | -1 | -0.9975      | -0.45785    |
| A_24_P337700 | 8876      | VNN1                  | -1 | -0.8985      | 0.596       |
| A_32_P195387 | 286144    | C8orf83               | -1 | -1.4405      | -0.858      |
| A_23_P120354 | 65124     | ANKRD57               | 1  | 0.3725       | -0.056      |
| A_23_P153197 | 7050      | TGIF1                 | 1  | -0.233       | -0.77       |

Suppl emental Tabl e1

|              |        |           |    |              |             |         |
|--------------|--------|-----------|----|--------------|-------------|---------|
| A_23_P402899 | 162394 | SLFN5     | -1 | 1.06375      | 1.602       |         |
| A_24_P177631 | 79649  | MAP7D3    | -1 | 0.3245       | 0.814       |         |
| A_23_P258862 | 27250  | PDCD4     | 1  | 2.0715       | 1.357       |         |
| A_24_P795371 | 644192 | LOC644192 |    | -1           | -0.577      | -0.067  |
| A_24_P207195 | 79191  | IRX3      | 1  | 1.2635       | 0.459       |         |
| A_23_P106720 | 10607  | TBL3      | 1  | -0.6695      | -1.438      |         |
| A_23_P85990  | 80143  | SIKE1     | -1 | -0.505       | -0.033      |         |
| A_32_P136295 | 2788   | GNG7      | 1  | 1.831        | 0.684       |         |
| A_24_P91852  | 6990   | DYNLT3    | -1 | -0.692       | 0.019       |         |
| A_24_P120907 | 5239   | PGM5      | -1 | 2.168        | 2.774       |         |
| A_23_P218456 | 3609   | ILF3      | 1  | -0.6415      | -1.108      |         |
| A_23_P158406 | 5144   | PDE4D     | -1 | -0.088       | 0.937       |         |
| A_24_P36745  | 159013 | CXorf38   | -1 | -1.15875     |             | -0.533  |
| A_23_P376870 | 122616 | C14orf79  |    | 1            | -0.0355     | -0.8085 |
| A_23_P116376 | 79869  | CPSF7     | 1  | -0.328       | -0.98       |         |
| A_23_P383060 | 8884   | SLC5A6    | 1  | 0.2635       | -0.282      |         |
| A_23_P142697 | 9654   | TTLL4     | 1  | -0.789       | -1.505      |         |
| A_23_P128215 | 8835   | SOCS2     | -1 | -0.16675     |             | 0.096   |
| A_23_P14174  | 10673  | TNFSF13B  |    | -1           | 1.3255      | 2.433   |
| A_23_P202    | 2060   | EPS15     | -1 | 0.470025     |             | 1.1575  |
| A_24_P227617 | 91612  | CHURC1    | -1 | 0.28825      | 0.817       |         |
| A_32_P117016 | 160428 | ALDH1L2   | -1 | 0.3195       | 1.199       |         |
| A_32_P177024 | 51119  | SBDS      | -1 | 0.182        | 0.984       |         |
| A_23_P142560 | 9839   | ZEB2      | -1 | 2.58675      | 3.449       |         |
| A_23_P169112 | 29894  | CPSF1     | 1  | -0.2875      | -1.17       |         |
| A_23_P255672 | 84448  | ABLIM2    | -1 | 1.318        | 2.326       |         |
| A_23_P106024 | 3714   | JAG2      | 1  | 1.5995       | 0.872       |         |
| A_23_P320553 | 8541   | PPFIA3    | 1  | -0.751       | -1.43       |         |
| A_23_P22625  | 10479  | SLC9A6    | -1 | -0.395277778 |             | 0.206   |
| A_24_P190168 | 27346  | TMEM97    | 1  | -1.711       | -2.396      |         |
| A_23_P141730 | 1829   | DSG2      | 1  | 0.457        | -0.277      |         |
| A_24_P270496 | 4857   | NOVA1     | -1 | 0.7025       | 1.364       |         |
| A_23_P23855  | 84265  | POLR3GL   | -1 | 0.8535       | 1.318888889 |         |
| A_23_P206474 | 84231  | TRAF7     | 1  | -0.477       | -0.943      |         |
| A_23_P86653  | 5552   | SRGN      | -1 | 1.2555       | 1.999       |         |
| A_23_P156880 | 5167   | ENPP1     | -1 | -0.5165      | 0.044       |         |
| A_24_P208436 | 5136   | PDE1A     | -1 | -0.44705     |             | 0.7153  |
| A_23_P168974 | 6386   | SDCBP     | -1 | 0.484        | 1.419       |         |
| A_24_P21715  | 5883   | RAD9A     | 1  | 0.0215       | -0.468      |         |
| A_23_P68824  | 6598   | SMARCB1   | 1  | -0.7395      | -1.325      |         |
| A_23_P44291  | 10491  | CRTAP     | -1 | 0.6815       | 1.451       |         |
| A_32_P116271 | 404201 | WDFY3-AS2 |    | -1           | -0.076      | 0.519   |
| A_23_P69699  | 4886   | NPY1R     | -1 | 2.131        | 3.262       |         |
| A_23_P59358  | 285753 | CEP57L1   | -1 | -1.17        | -0.608      |         |
| A_24_P60887  | 284    | ANGPT1    | -1 | 0.543        | 1.73        |         |
| A_24_P87763  | 1938   | EEF2      | 1  | 0.384675     |             | -0.274  |
| A_24_P402847 | 1182   | CLCN3     | -1 | 0.6975       | 1.234       |         |
| A_24_P330234 | 5412   | UBL3      | -1 | 0.3285       | 0.977       |         |
| A_23_P66813  | 51547  | SIRT7     | 1  | -0.2065      | -0.788      |         |
| A_23_P109606 | 6305   | SBF1      | 1  | -0.264       | -0.4598     |         |
| A_24_P188231 | 54873  | PALMD     | -1 | 3.92525      | 4.332       |         |
| A_24_P917650 | 27235  | COQ2      | -1 | -1.5745      | -0.9135     |         |
| A_24_P378368 | 8720   | MBTPS1    | 1  | -0.388       | -1.082      |         |
| A_23_P163622 | 64400  | AKTIP     | -1 | 0.3925       | 1.304       |         |
| A_24_P50437  | NA     | NA        | 1  | -0.0685      | -0.766      |         |
| A_24_P503710 | 727910 | TLCD2     | -1 | 2.724        | 3.47        |         |
| A_23_P144096 | 1154   | CISH      | 1  | 1.177        | 0.247       |         |
| A_32_P158966 | 51348  | KLRF1     | -1 | 1.3755       | 2.139       |         |
| A_24_P254949 | 5239   | PGM5      | -1 | 2.0985       | 2.975       |         |
| A_23_P87827  | 84747  | UNC119B   | 1  | 0.2655       | -0.37       |         |
| A_23_P162746 | 51084  | CRYL1     | -1 | 0.184        | 0.796       |         |
| A_24_P100613 | 284217 | LAMA1     | 1  | -1.46675     |             | -2.281  |
| A_23_P76914  | 6495   | SIX1      | -1 | -0.3075      | 1.009428571 |         |

## Suppl emental Tabl e1

|              |        |             |    |           |              |
|--------------|--------|-------------|----|-----------|--------------|
| A_23_P9392   | 51490  | C9orf114    | 1  | -0.4465   | -1.206       |
| A_23_P12733  | 55506  | H2AFY2      | 1  | 0.097     | -0.771       |
| A_32_P213103 | 4094   | MAF         | -1 | 0.79225   | 1.65         |
| A_23_P255345 | 8876   | VNN1        | -1 | -0.48275  | 0.915        |
| A_24_P456452 | 9444   | QKI         | -1 | 0.791     | 1.831        |
| A_24_P202139 | 51108  | METTL9      | 1  | -0.107    | -0.666       |
| A_23_P104641 | 738    | C11orf2     | 1  | 1.13275   | 0.67         |
| A_23_P147166 | 55799  | CACNA2D3    | -1 | -0.207    | 0.595        |
| A_32_P36192  | 7919   | DDX39B      | 1  | 0.1895    | -0.431       |
| A_24_P65292  | 30812  | SOX8        | 1  | 1.19975   | 0.164        |
| A_32_P123771 | 514    | ATP5E       | -1 | -0.4485   | -0.069       |
| A_23_P125643 | 140462 | ASB9        | -1 | -1.181    | -0.895       |
| A_24_P399009 | 23644  | EDC4        | 1  | -0.35825  | -0.861       |
| A_23_P28730  | 57473  | ZNF512B     | 1  | -0.151925 | -0.6805      |
| A_23_P168532 | 6624   | FSCN1       | 1  | -1.07475  | -2.083666667 |
| A_32_P117354 | 22998  | LIMCH1      | -1 | 2.0645    | 2.665        |
| A_32_P198325 | 388886 | C22orf36    | 1  | 1.228     | 0.209        |
| A_23_P158239 | 6472   | SHMT2       | 1  | -1.6046   | -2.208       |
| A_23_P408249 | 5105   | PCK1        | -1 | 1.6595    | 3.091        |
| A_23_P71148  | 644    | BLVRA       | -1 | -0.1115   | 0.492        |
| A_23_P60296  | 26578  | OSTF1       | -1 | -0.22     | 0.353        |
| A_23_P214638 | 10919  | EHMT2       | 1  | -0.2295   | -0.77        |
| A_23_P5131   | 51477  | ISYNA1      | 1  | -0.149625 | -0.921       |
| A_23_P75769  | 51338  | MS4A4A      | -1 | 0.991     | 2.972        |
| A_23_P45011  | 81706  | PPP1R14C    | 1  | -0.7125   | -2.427       |
| A_32_P222857 | 27316  | RBMX        | 1  | -0.5205   | -0.987       |
| A_23_P428080 | 22833  | KIAA0894    | -1 | 2.3695    | 3.6869       |
| A_23_P41734  | 55819  | RNF130      | -1 | 1.3455    | 2.071        |
| A_23_P200160 | 3075   | CFH         | -1 | 2.442     | 3.302        |
| A_24_P100605 | 57186  | RALGAPA2    | -1 | 0.9375    | 1.653        |
| A_24_P229536 | NA     | NA          | -1 | 1.8705    | 2.301        |
| A_32_P74615  | 389058 | SP5         | 1  | 1.632     | 0.2085       |
| A_23_P109304 | 6526   | SLC5A3      | -1 | -0.7715   | -0.162       |
| A_23_P300600 | 4744   | NEFH        | 1  | -1.524    | -2.609       |
| A_23_P52227  | 2662   | GDF10       | -1 | 3.948     | 4.659        |
| A_24_P935986 | 586    | BCAT1       | -1 | -3.6875   | -2.471444444 |
| A_23_P19243  | 55389  | AKIRIN2-AS1 | -1 | -0.2459   | 0.611        |
| A_23_P99771  | 9240   | PNMA1       | -1 | 0.2315    | 0.883        |
| A_24_P362540 | 8853   | ASAP2       | -1 | 0.262     | 0.803        |
| A_32_P119616 | 2108   | ETFA        | -1 | -0.8965   | -0.2835      |
| A_23_P106822 | 28987  | NOB1        | 1  | -0.6735   | -1.333       |
| A_23_P212617 | 7037   | TFRC        | -1 | -2.91     | -2.11        |
| A_23_P100263 | 80790  | CMIP        | 1  | 1.593     | 0.252        |
| A_23_P103981 | 723790 | HIST2H2AA4  | 1  | -1.6008   | -2.193       |
| A_23_P141329 | 6198   | RPS6KB1     | -1 | -1.502    | -0.964       |
| A_23_P371495 | 83857  | TMTC1       | -1 | 1.8575    | 2.506        |
| A_32_P79190  | 375010 | LOC375010   | -1 | -0.1175   | 0.54         |
| A_23_P76480  | 9976   | CLEC2B      | -1 | 0.452     | 1.4306       |
| A_23_P311010 | 10251  | SPRY3       | -1 | 1.34175   | 2.013        |
| A_23_P334955 | 83648  | FAM167A     | 1  | -2.4275   | -3.0445      |
| A_23_P87310  | 4004   | LMO1        | -1 | -1.7895   | -1.1365      |
| A_24_P259328 | 142678 | MI B2       | 1  | 0.667     | 0.048        |
| A_23_P402936 | 8499   | PPF1A2      | -1 | 0.5065    | 1.334        |
| A_23_P301984 | 157773 | C8orf48     | -1 | 0.253     | 0.869        |
| A_32_P146815 | 4257   | MGST1       | -1 | 0.6195    | 1.529        |
| A_23_P328642 | 151254 | ALS2CR11    | -1 | 0.0195    | 0.432        |
| A_32_P391586 | 201134 | CEP112      | -1 | 0.8155    | 1.308        |
| A_23_P41716  | 10399  | GNB2L1      | 1  | -0.2275   | -0.7655      |
| A_23_P50455  | 5424   | POLD1       | 1  | -1.541    | -2.127       |
| A_23_P29257  | 3005   | H1FO        | 1  | 0.7725    | -0.2875      |
| A_32_P62342  | 283464 | GXYLT1      | -1 | -1.4825   | -0.885       |
| A_23_P9932   | 27250  | PDCD4       | 1  | 0.877     | 0.446        |
| A_24_P156501 | 1879   | EBF1        | -1 | 4.1855    | 4.624        |

Suppl emental Tabl e1

|              |           |           |    |              |             |         |  |
|--------------|-----------|-----------|----|--------------|-------------|---------|--|
| A_24_P46357  | 4651      | MYO10     | 1  | -1.274       | -1.936      |         |  |
| A_23_P50426  | 25959     | KANK2     | -1 | 1.182        | 1.711       |         |  |
| A_23_P203947 | 1663      | DDX11     | 1  | -0.73        | -1.191      |         |  |
| A_32_P162004 | 6159      | RPL29     | 1  | 0.016        | -0.3845     |         |  |
| A_24_P92952  | 8289      | ARID1A    | 1  | 0.025        | -0.319      |         |  |
| A_23_P257694 | 9569      | GTF2IRD1  | 1  | 1            | -0.7365     | -1.2725 |  |
| A_23_P337934 | 54751     | FBLIM1    | 1  | 0.4485       | -0.095      |         |  |
| A_24_P937325 | 121512    | FGD4      | -1 | 0.0705       | 1.559       |         |  |
| A_23_P29499  | 1499      | CTNNB1    | 1  | 0.2405       | -0.215      |         |  |
| A_23_P66891  | 23580     | CDC42EP4  | 1  | 1            | 1.36475     | 0.573   |  |
| A_24_P925186 | 6660      | SOX5      | -1 | -1.1595      | -0.4202     |         |  |
| A_23_P209394 | 8837      | CFLAR     | -1 | 0.3215       | 1.075       |         |  |
| A_23_P417148 | 10743     | RAI1      | 1  | 0.21975      | -0.476      |         |  |
| A_23_P102508 | 8884      | SLC5A6    | 1  | 0.372        | -0.274      |         |  |
| A_23_P55421  | 57332     | CBX8      | 1  | -0.4785      | -1.126      |         |  |
| A_23_P166087 | 9770      | RASSF2    | -1 | 1.007        | 1.77        |         |  |
| A_24_P76158  | 139818    | DOCK11    | -1 | 1.5235       | 2.881       |         |  |
| A_23_P131375 | 130814    | PQLC3     | -1 | 0.6935       | 1.7         |         |  |
| A_23_P144916 | 9945      | GFPT2     | -1 | 0.067        | 0.812       |         |  |
| A_23_P96087  | 8971      | H1FX      | 1  | -0.049       | -0.922      |         |  |
| A_23_P112726 | 6335      | SCN9A     | -1 | -0.6915      | 0.836       |         |  |
| A_24_P267592 | 25939     | SAMHD1    | -1 | 0.9295       | 1.5785      |         |  |
| A_23_P114670 | 27237     | ARHGEF16  | 1  | 1            | -0.051      | -0.539  |  |
| A_24_P216313 | 51614     | ERGIC3    | 1  | -0.2895      | -0.8669     |         |  |
| A_23_P91095  | 940       | CD28      | -1 | -3.112       | -1.21       |         |  |
| A_23_P353014 | 93589     | CACNA2D4  | -1 | -1           | -0.6285     | 0.095   |  |
| A_24_P246552 | 10490     | VTI1B     | -1 | 0.1815       | 0.916       |         |  |
| A_23_P44088  | 100289410 | MCF2L-AS1 | 1  | 1            | 0.8595      | -0.493  |  |
| A_23_P310560 | 131870    | NUDT16    | -1 | 1.137        | 1.745       |         |  |
| A_23_P43940  | 57188     | ADAMTSL3  | -1 | -1           | 2.97975     | 3.572   |  |
| A_23_P385322 | 57559     | STAMBPL1  | -1 | -1           | -1.615      | -0.962  |  |
| A_23_P99386  | 8600      | TNFSF11   | 1  | 2.239        | 0.209       |         |  |
| A_23_P71570  | 116039    | OSR2      | -1 | -0.509       | 0.682       |         |  |
| A_23_P126398 | 9869      | SETDB1    | 1  | -0.27125     |             | -0.767  |  |
| A_23_P356554 | 9532      | BAG2      | -1 | -2.3375      | -1.728      |         |  |
| A_24_P278637 | 8772      | FADD      | 1  | -0.781       | -1.2505     |         |  |
| A_23_P200801 | 9659      | PDE4DI P  | -1 | 0.099        | 0.884       |         |  |
| A_24_P648176 | 144363    | LYRM5     | -1 | 0.5405       | 1.234       |         |  |
| A_23_P317591 | 10371     | SEMA3A    | -1 | -2.423       | -0.846      |         |  |
| A_32_P223935 | 554203    | JPX       | -1 | -0.1         | 0.27        |         |  |
| A_23_P59045  | 3012      | HIST1H2AE | 1  | 1            | -1.558      | -2.035  |  |
| A_23_P132845 | 1181      | CLCN2     | 1  | -0.73125     |             | -1.325  |  |
| A_23_P204998 | 10160     | FARP1     | 1  | -0.057       | -0.514      |         |  |
| A_23_P118544 | 1213      | CLTC      | -1 | -1.1205      | -0.574      |         |  |
| A_23_P66872  | 50628     | GEMIN4    | 1  | -0.279       | -0.954      |         |  |
| A_23_P99253  | 8825      | LIN7A     | -1 | -1.1865      | -0.745      |         |  |
| A_23_P26476  | 84219     | WDR24     | 1  | -0.176       | -0.741      |         |  |
| A_32_P147622 | 100289410 | MCF2L-AS1 | 1  | 1            | 0.9         | -0.502  |  |
| A_23_P336083 | 22902     | RUFY3     | -1 | 0.552        | 0.939       |         |  |
| A_24_P221385 | 84288     | EFCAB2    | 1  | 1.504        | 0.472       |         |  |
| A_23_P397455 | 130399    | ACVR1C    | -1 | 4.919        | 5.617       |         |  |
| A_24_P192301 | 10371     | SEMA3A    | -1 | -2.124       | -0.55       |         |  |
| A_23_P131435 | 9936      | CD302     | -1 | 1.123        | 1.784       |         |  |
| A_23_P138635 | 664       | BNI P3    | -1 | -1.563       | -0.71       |         |  |
| A_23_P216610 | 64420     | SUSD1     | -1 | -0.2925      | 0.581888889 |         |  |
| A_24_P28722  | 91543     | RSAD2     | -1 | 1.9535       | 2.83        |         |  |
| A_23_P73702  | 9968      | MED12     | 1  | -0.0295      | -0.65       |         |  |
| A_24_P307974 | 129685    | TAF8      | -1 | -0.343944444 |             | 0.318   |  |
| A_23_P251132 | 54221     | SNTG2     | -1 | 2.342        | 2.914       |         |  |
| A_24_P904903 | 7919      | DDX39B    | 1  | -0.4065      | -0.856      |         |  |
| A_23_P162120 | 4926      | NUMA1     | 1  | 0.60925      | -0.262      |         |  |
| A_23_P4308   | 5338      | PLD2      | 1  | 0.5185       | 0.246       |         |  |
| A_24_P801451 | 10919     | EHMT2     | 1  | -0.7045      | -1.108      |         |  |

Suppl emental Tabl e1

|              |        |           |    |              |              |        |
|--------------|--------|-----------|----|--------------|--------------|--------|
| A_24_P255218 | 4644   | MY05A     | -1 | -1.08        | -0.373       |        |
| A_23_P26759  | 124583 | CANT1     | 1  | -0.4715      | -0.981       |        |
| A_23_P154025 | 6741   | SSB       | -1 | -0.857       | -0.299627778 |        |
| A_24_P316430 | 4907   | NT5E      | -1 | -1.760444444 | -1.132       |        |
| A_24_P469255 | NA     | NA        | -1 | 0.0515       | 0.871        |        |
| A_23_P105461 | 1240   | CMKLR1    | -1 | 1.7785       | 3.765        |        |
| A_23_P397376 | 4094   | MAF       | -1 | 0.421        | 1.1095       |        |
| A_23_P19348  | 9820   | CUL7      | 1  | -0.1965      | -0.769       |        |
| A_32_P224840 | 64400  | AKTIP     | -1 | 0.249        | 1.166        |        |
| A_32_P118847 | 441094 | FLJ42709  | -1 | -1           | 0.1655       | 1.097  |
| A_24_P25137  | 1131   | CHRM3     | 1  | -0.61595     | -1.288666667 |        |
| A_23_P140384 | 1511   | CTSG      | -1 | 1.91         | 3.325        |        |
| A_24_P374154 | 10291  | SF3A1     | 1  | -0.09195     | -0.642       |        |
| A_23_P69218  | 55831  | TMEM111   | -1 | 0.4320625    | 0.887        |        |
| A_24_P371281 | 80723  | TMEM22    | -1 | 0.6765       | 1.444        |        |
| A_23_P252681 | 5130   | PCYT1A    | -1 | -0.2508      | 0.217        |        |
| A_23_P151459 | 23077  | MYCBP2    | -1 | 1.1295       | 1.751        |        |
| A_23_P373100 | 158295 | MGC24103  | -1 | -1           | -0.1765      | 1.028  |
| A_23_P338912 | 22822  | PHLDA1    | 1  | -1.0615      | -2.0355      |        |
| A_24_P347447 | 23002  | DAAM1     | -1 | 0.906        | 1.495        |        |
| A_23_P17287  | 285148 | IAH1      | -1 | 0.309        | 0.768        |        |
| A_23_P122052 | 493869 | GPX8      | -1 | -1.54        | -1.06        |        |
| A_24_P381441 | 55885  | LMO3      | -1 | 2.3765       | 4.059        |        |
| A_23_P105794 | 94240  | EPSTI1    | -1 | -0.2415      | 0.315        |        |
| A_23_P35725  | 63982  | ANO3      | -1 | 2.272        | 4.073        |        |
| A_23_P8513   | 29887  | SNX10     | -1 | -1.109       | 0.826        |        |
| A_23_P141779 | 30827  | CXXC1     | 1  | 0.04071875   | -0.718       |        |
| A_24_P322474 | 5141   | PDE4A     | -1 | 0.9105       | 1.497        |        |
| A_24_P68631  | 317772 | HIST2H2AB | 1  | -1.271       | -1.811       |        |
| A_23_P45456  | 1193   | CLIC2     | -1 | 0.319        | 1.386        |        |
| A_23_P103496 | 115361 | GBP4      | -1 | 3.571        | 4.211        |        |
| A_23_P406448 | 51209  | RAB9B     | -1 | -0.3605      | 0.142        |        |
| A_23_P54622  | 3835   | KIF22     | 1  | -1.952       | -2.267       |        |
| A_23_P213678 | 5066   | PAM       | -1 | 0.235        | 1.101        |        |
| A_23_P142574 | 116255 | MOGAT1    | -1 | 1.735        | 2.409        |        |
| A_23_P23234  | 84719  | LINC00260 | -1 | -1           | 0.16         | 1.118  |
| A_23_P27744  | 23403  | FBX046    | 1  | 0.5195       | -0.061       |        |
| A_23_P331670 | 5834   | PYGB      | 1  | 0.507        | -0.326       |        |
| A_23_P50456  | 5424   | POLD1     | 1  | -1.474       | -1.878       |        |
| A_23_P6802   | 9136   | RRP9      | 1  | -0.227       | -0.858       |        |
| A_24_P136182 | 256355 | RPS2P32   | 1  | -0.74125     | -1.438       |        |
| A_23_P56894  | 57404  | CYP20A1   | -1 | -0.5405      | 0.025        |        |
| A_23_P35970  | 2542   | SLC37A4   | 1  | -0.758       | -1.12        |        |
| A_23_P53588  | 81029  | WNT5B     | 1  | -0.428678571 | -1.015       |        |
| A_23_P113417 | 80233  | C17orf70  | 1  | 1            | 0.14         | -0.502 |
| A_23_P142421 | 9757   | MLL4      | 1  | 0.0515       | -0.489       |        |
| A_23_P887    | 9641   | IKBKE     | 1  | -0.303275    | -1.0769      |        |
| A_24_P392486 | 339344 | MYPOP     | 1  | 1.313        | 0.294        |        |
| A_24_P190804 | 8905   | AP1S2     | -1 | -1.153       | -0.371       |        |
| A_24_P355464 | 2662   | GDF10     | -1 | 2.468        | 3.2735       |        |
| A_23_P213857 | 730    | C7        | -1 | 1.6685       | 2.627        |        |
| A_23_P148047 | 5734   | PTGER4    | -1 | 1.946        | 2.446        |        |
| A_23_P142918 | 205327 | C2orf69   | -1 | -0.89575     | -0.222       |        |
| A_23_P24515  | 38     | ACAT1     | -1 | 0.146        | 1.056        |        |
| A_23_P214139 | 5980   | REV3L     | -1 | 0.0955       | 0.727        |        |
| A_32_P131640 | 139065 | SLITRK4   | -1 | 0.7315       | 1.401        |        |
| A_23_P41194  | 151827 | LRRC34    | -1 | -0.1445      | 1.024        |        |
| A_32_P188953 | NA     | NA        | -1 | 1.915        | 2.477        |        |
| A_23_P87879  | 969    | CD69      | -1 | -2.3575      | -1.345       |        |
| A_24_P413437 | 4841   | NONO      | 1  | -1.292       | -1.776       |        |
| A_23_P60405  | 64794  | DDX31     | 1  | -0.8745      | -1.468       |        |
| A_24_P119141 | 5627   | PROS1     | -1 | 0.781        | 1.181        |        |
| A_23_P68922  | 85377  | MI CALL1  | 1  | -0.418       | -0.897       |        |

Suppl emental Tabl e1

|              |           |              |    |             |         |         |       |
|--------------|-----------|--------------|----|-------------|---------|---------|-------|
| A_24_P4054   | 7205      | TRIP6        | 1  | 0.3555      | -0.388  |         |       |
| A_24_P379223 | 51278     | IER5         | 1  | 1.7865      | 0.365   |         |       |
| A_23_P149281 | 1969      | EPHA2        | 1  | -0.21       | -1.154  |         |       |
| A_32_P132317 | 151556    | GPR155       | -1 | 0.319       | 1.512   |         |       |
| A_23_P13820  | 6579      | SLC01A2      | 1  | -0.27       | -1.168  |         |       |
| A_24_P940115 | 10395     | DLC1         | -1 | 1.766       | 2.49    |         |       |
| A_23_P12549  | 54518     | APBB1IP      | -1 | 1.7985      | 2.986   |         |       |
| A_23_P215175 | 10061     | ABCF2        | 1  | -0.6165     | -1.353  |         |       |
| A_23_P41143  | 327       | APEH         | 1  | -0.605      | -1.326  |         |       |
| A_23_P24716  | 54972     | TMEM132A     | 1  |             | -0.984  | -1.685  |       |
| A_23_P121926 | 6414      | SEPP1        | -1 | 1.649166667 |         | 2.557   |       |
| A_24_P364296 | 2054      | STX2         | -1 | -0.0715     | 0.51    |         |       |
| A_32_P158746 | 6139      | RPL17        | 1  | 0.0205      | -0.51   |         |       |
| A_23_P109655 | 80723     | TMEM22       | -1 | 0.789       | 1.533   |         |       |
| A_23_P423237 | 6445      | SGCG         | -1 | 0.194       | 1.944   |         |       |
| A_23_P162970 | 79711     | IPO4         | 1  | -0.7595     | -1.434  |         |       |
| A_24_P677525 | 23654     | PLXNB2       | 1  | 0.499       | -0.198  |         |       |
| A_23_P111171 | 8705      | B3GALT4      | -1 | 2.113625    |         | 2.872   |       |
| A_24_P191781 | 25849     | PARM1        | -1 | 3.5315      | 4.177   |         |       |
| A_23_P307940 | 830       | CAPZA2       | -1 | -0.5245     | 0.242   |         |       |
| A_23_P131887 | 6666      | SOX12        | 1  | -1.0465     | -2.033  |         |       |
| A_23_P114740 | 3075      | CFH          | -1 | 2.7025      | 3.5138  |         |       |
| A_24_P151464 | 6647      | SOD1         | -1 | -0.3        | 0.26    |         |       |
| A_23_P256663 | 8484      | GALR3        | 1  | 1.3055      | 0.466   |         |       |
| A_23_P96965  | 81493     | SYNC         | -1 | -0.256      | 0.87    |         |       |
| A_23_P873    | 9473      | C1orf38      | -1 | 0.8155      | 1.865   |         |       |
| A_32_P206541 | 647121    | EMBP1        | -1 | -1.0525     | 0.3725  |         |       |
| A_23_P93321  | 6941      | TCF19        | 1  | -1.2135     | -1.8165 |         |       |
| A_24_P604851 | 23002     | DAAM1        | -1 | 0.871583333 |         | 1.387   |       |
| A_32_P193646 | 27316     | RBMX         | 1  | -0.5685     | -0.965  |         |       |
| A_24_P269619 | 1666      | DECR1        | -1 | 0.5725      | 1.203   |         |       |
| A_23_P58557  | 206338    | AQPEP        | -1 | 3.9544375   |         | 5.424   |       |
| A_23_P79978  | 57419     | SLC24A3      | -1 | 1.787       | 2.622   |         |       |
| A_23_P30338  | 902       | CCNH         | -1 | -0.4595     | 0.2115  |         |       |
| A_23_P144348 | 9353      | SLIT2        | -1 | 2.555       | 3.099   |         |       |
| A_24_P194886 | 23301     | EHBP1        | -1 | 0.98085     | 1.483   |         |       |
| A_23_P327451 | 4883      | NPR3         | -1 | 1.26375     | 2.775   |         |       |
| A_23_P308519 | 9368      | SLC9A3R1     | 1  |             | -1.001  | -1.811  |       |
| A_24_P326491 | 283078    | MKX          | -1 | 0.2455      | 1.28    |         |       |
| A_23_P320478 | 80154     | AGSK1        | 1  | -0.92       | -2.0055 |         |       |
| A_24_P943815 | 8228      | PNPLA4       | -1 | 2.3685      | 2.95    |         |       |
| A_23_P142634 | 29081     | METTL5       | -1 | -0.47225    |         | -0.0335 |       |
| A_24_P211797 | 130026    | ICA1L        | -1 | -1.06725    |         | -0.482  |       |
| A_24_P213354 | NA        | NA           | 1  | 0.0185      | -0.754  |         |       |
| A_23_P156087 | 2690      | GHR          | -1 | 4.8385      | 5.43    |         |       |
| A_32_P128572 | 57708     | MIER1        | -1 | -0.5215     | 0.046   |         |       |
| A_23_P11713  | NA        | NA           | -1 | 0.063       | 0.478   |         |       |
| A_23_P366253 | 23598     | PATZ1        | 1  | 0.6445      | 0.147   |         |       |
| A_32_P140898 | 3344      | FOXN2        | -1 | 0.7995      | 1.243   |         |       |
| A_24_P106057 | 116211    | TM4SF19      | -1 | 0.314       | 1.177   |         |       |
| A_23_P70719  | 3908      | LAMA2        | -1 | 4.3705      | 5.0665  |         |       |
| A_24_P542291 | NA        | NA           | 1  | 1.3035      | 0.026   |         |       |
| A_24_P269101 | 4762      | NEUROG1      | 1  | 1.4045      | 0.533   |         |       |
| A_23_P396858 | 8325      | FZD8         | 1  | 0.123       | -0.419  |         |       |
| A_24_P187799 | 79974     | C7orf58      | -1 | -0.589      | 0.638   |         |       |
| A_23_P103503 | 4194      | MDM4         | -1 | -0.394      | 0.2     |         |       |
| A_23_P8754   | 10157     | AASS         | -1 | -0.1025     | 0.418   |         |       |
| A_23_P126689 | 27005     | USP21        | 1  | -0.045      | -0.687  |         |       |
| A_32_P106615 | 9353      | SLIT2        | -1 | 2.7065      | 3.437   |         |       |
| A_23_P57236  | 2686      | GGT7         | 1  | 0.3565      | -0.664  |         |       |
| A_24_P413941 | 205327    | C2orf69      | -1 | -0.109      | 0.355   |         |       |
| A_24_P98210  | 22797     | TFEC         | -1 | 1.31775     | 2.413   |         |       |
| A_24_P934135 | 100129406 | LOC100129406 | -1 |             |         | 0.596   | 1.904 |

Suppl emental Tabl e1

|              |           |          |    |               |             |               |
|--------------|-----------|----------|----|---------------|-------------|---------------|
| A_23_P25293  | 9918      | NCAPD2   | 1  | -2.045        | -2.467      |               |
| A_24_P942481 | 160897    | GPR180   | -1 | -0.457        | 0.432       |               |
| A_24_P171549 | 83879     | CDCA7    | 1  | -4.00025      |             | -4.694        |
| A_24_P170454 | 9098      | USP6     | -1 | -2.00175      |             | -1.432        |
| A_32_P116857 | 50940     | PDE11A   | -1 | 0.9635        | 2.248       |               |
| A_23_P171054 | 2002      | ELK1     | 1  | -0.63         | -1.116      |               |
| A_23_P38987  | 4849      | CNOT3    | 1  | 0.00125       | -0.63       |               |
| A_24_P277211 | 3269      | HRH1     | -1 | -0.2975       | 0.589       |               |
| A_23_P375524 | 353134    | LCE1D    | 1  | 1.6275        | 0.416       |               |
| A_32_P48842  | 644538    | CXorf69  | -1 | -0.88         | -0.315      |               |
| A_24_P201702 | 9976      | CLEC2B   | -1 | 0.285         | 1.264       |               |
| A_24_P787947 | 388403    | YPEL2    | -1 | 2.49875       | 2.953777778 |               |
| A_23_P146885 | 2837      | UTS2R    | 1  | 1.757         | 0.745       |               |
| A_24_P98109  | 29887     | SNX10    | -1 | -1.559        | 0.581       |               |
| A_23_P302654 | 55722     | CEP72    | 1  | -1.601        | -2.019      |               |
| A_24_P276947 | 10097     | ACTR2    | -1 | -0.812        | -0.472      |               |
| A_23_P250866 | 81628     | TSC22D4  | 1  | 0.2305        | -0.489      |               |
| A_24_P14731  | 27344     | PCSK1N   | 1  | 1.5105        | 0.1         |               |
| A_24_P117528 | 5634      | PRPS2    | 1  | -1.3125       | -1.939      |               |
| A_23_P25964  | 2581      | GALC     | -1 | 0.8495        | 1.592       |               |
| A_23_P207280 | 10513     | APPBP2   | -1 | -0.7285       | -0.118      |               |
| A_32_P167396 | NA        | NA       | -1 | 0.892         | 1.862       |               |
| A_32_P220472 | 54469     | ZFAND6   | -1 | 0.258         | 0.756       |               |
| A_23_P140527 | 27023     | FOXB1    | 1  | 1.1115        | 0.327       |               |
| A_23_P422083 | 55529     | TMEM55A  | -1 | 0.2595        | 0.976       |               |
| A_23_P117662 | 3067      | HDC      | -1 | 2.255         | 3.69        |               |
| A_24_P57367  | 191       | AHCY     | 1  | -1.461        | -2.315      |               |
| A_23_P131096 | 5442      | POLRMT   | 1  | -0.02535      |             | -0.55         |
| A_32_P36694  | 221895    | JAZF1    | -1 | 0.9479        | 1.598       |               |
| A_23_P306964 | 55752     | 11-Sep   | -1 | -0.235        | 0.517       |               |
| A_23_P132595 | 9686      | VGLL4    | 1  | 0.762         | 0.128       |               |
| A_24_P263956 | 552889    | ATXN7L3B | 1  | 1             | 0.7         | 0.225         |
| A_23_P115105 | 26099     | C1orf144 | -1 | -1            | 0.0655      | 0.687         |
| A_23_P399201 | 7117      | TMSL3    | -1 | 0.8415        | 1.305       |               |
| A_23_P66719  | 147015    | DHRS13   | 1  | -1.08375      |             | -1.788        |
| A_23_P425925 | 125113    | KRT222   | -1 | 1.5519        | 2.285       |               |
| A_23_P254165 | 10742     | RAI2     | -1 | 3.6475        | 4.157       |               |
| A_23_P100355 | 5531      | PPP4C    | 1  | -1.03835      |             | -1.488        |
| A_24_P383480 | 5627      | PROS1    | -1 | 0.1225        | 0.632       |               |
| A_23_P426663 | 4286      | MITF     | -1 | -1.706        | -0.532      |               |
| A_24_P74981  | 23028     | KDM1A    | 1  | -0.8415       | -1.34       |               |
| A_23_P397978 | 285966    | FAM115C  | 1  | 0.13          | -0.4195     |               |
| A_24_P272352 | NA        | NA       | -1 | -0.8315       | -0.34       |               |
| A_23_P211445 | 3985      | LIMK2    | 1  | 1.3285        | 0.472       |               |
| A_32_P66843  | 100170765 | C19orf69 | -1 | -1            |             | -1.5925 -0.78 |
| A_23_P84154  | 55843     | ARHGAP15 | -1 | -0.315        |             | 0.528         |
| A_24_P236799 | 11031     | RAB31    | -1 | -0.6013333333 |             | 0.116         |
| A_23_P408215 | 197335    | WDR90    | 1  | -0.199        | -0.715      |               |
| A_23_P151415 | 84056     | KATNAL1  | -1 | 0.42975       | 0.957       |               |
| A_24_P203678 | 38        | ACAT1    | -1 | 0.0645        | 1.007       |               |
| A_23_P131825 | 7125      | TNNC2    | -1 | 1.9005        | 2.464       |               |
| A_23_P209347 | 91526     | ANKRD44  | -1 | -0.9495       | -0.24       |               |
| A_24_P133584 | 4240      | MFGE8    | 1  | 1.2205        | 0.474       |               |
| A_23_P117654 | 4644      | MYO5A    | -1 | -1.1315       | -0.577      |               |
| A_23_P304450 | 2627      | GATA6    | -1 | 0.1175        | 0.727       |               |
| A_23_P8801   | 1577      | CYP3A5   | -1 | -1.047        | 0.105       |               |
| A_32_P97489  | 7534      | YWHAZ    | -1 | -0.8465       | -0.091      |               |
| A_23_P138885 | 387758    | FIBIN    | -1 | 1.0795        | 2.372       |               |
| A_23_P31097  | 28962     | OSTM1    | -1 | -1.109        | 0.017       |               |
| A_24_P940426 | 9444      | QKI      | -1 | 2.243         | 3.408       |               |
| A_24_P265051 | 91584     | PLXNA4   | -1 | 2.47005       | 2.968       |               |
| A_23_P213840 | 8992      | ATP6VOE1 | -1 | -1            | 0.57525     | 1.19          |
| A_24_P177653 | NA        | NA       | 1  | 0.2185        | -0.221      |               |

Suppl emental Tabl e1

|              |           |              |    |             |              |             |
|--------------|-----------|--------------|----|-------------|--------------|-------------|
| A_24_P256219 | 4094      | MAF          | -1 | 0.396       | 1.321        |             |
| A_23_P88201  | 55012     | PPP2R3C      | -1 | -0.52085    |              | 0.0619375   |
| A_23_P21644  | 51170     | HSD17B11     |    | -1          | -0.06        | 0.6197      |
| A_23_P114713 | 1580      | CYP4B1       | -1 | 3.514972222 |              | 4.6365      |
| A_23_P17275  | 51277     | DNAJC27      | -1 | -0.05575    |              | 0.68        |
| A_32_P133916 | 54796     | BNC2         | -1 | 0.3445      | 0.74         |             |
| A_23_P64161  | 253935    | ANGPTL5      | -1 | 0.10535     | 2.075        |             |
| A_23_P368484 | 388341    | C17orf76     |    | -1          | 0.6045       | 1.208       |
| A_24_P59387  | 619426    | C8orf60      | -1 | 0.3199375   |              | 0.796111111 |
| A_23_P30294  | 1036      | CD01         | -1 | 4.3085      | 5.0613       |             |
| A_32_P152437 | 9590      | AKAP12       | -1 | 1.609       | 2.486        |             |
| A_23_P25888  | 122786    | FRMD6        | 1  | 0.3115      | -0.2745      |             |
| A_23_P99063  | 4060      | LUM          | -1 | 0.919       | 1.969        |             |
| A_23_P54000  | 58533     | SNX6         | -1 | 0.141       | 0.709        |             |
| A_23_P57868  | 95        | ACY1         | 1  | 0.449666667 |              | -0.093      |
| A_24_P70888  | 23654     | PLXNB2       | 1  | 0.863       | 0.334        |             |
| A_23_P4536   | 23136     | EPB41L3      | -1 | 0.6785      | 1.712        |             |
| A_24_P69538  | 7099      | TLR4         | -1 | 2.36475     | 3.25         |             |
| A_24_P108401 | 354       | KLK3         | 1  | 1.687       | 0.523        |             |
| A_24_P103952 | 8525      | DGKZ         | 1  | 0.1695      | -0.476       |             |
| A_24_P916378 | 92906     | HNRPLL       | -1 | -1.037      | -0.393       |             |
| A_32_P99311  | 353355    | ZNF233       | 1  | 0.5965      | -0.239       |             |
| A_24_P927444 | 92521     | SPECC1       | -1 | -0.2835     | 0.813        |             |
| A_23_P310    | 65108     | MARCKSL1     |    | 1           | -0.013       | -0.7755     |
| A_24_P357760 | 728131    | RPS6P6       | 1  | 0.6142      | 0.122        |             |
| A_23_P83838  | 767       | CA8          | 1  | 0.1095      | -0.3345      |             |
| A_23_P433798 | 79883     | PODNL1       | 1  | 0.6         | -0.496333333 |             |
| A_23_P97932  | 22921     | MSRB2        | -1 | 0.7205      | 1.035        |             |
| A_23_P23924  | 824       | CAPN2        | -1 | 0.7165      | 1.1295       |             |
| A_23_P109133 | 551       | AVP          | 1  | 1.3285      | 0.64         |             |
| A_24_P187774 | 79987     | SVEP1        | -1 | 3.1885      | 4.350428571  |             |
| A_23_P1904   | 2206      | MS4A2        | -1 | 1.3615      | 2.8768       |             |
| A_23_P335958 | 151556    | GPR155       | -1 | 0.382       | 1.076        |             |
| A_24_P351435 | 51185     | CRBN         | -1 | 0.1295      | 0.538        |             |
| A_24_P292710 | 51527     | C14orf129    |    | -1          | -1.149       | -0.492      |
| A_23_P144639 | 55374     | TMC06        | 1  | 0.3165      | -0.14        |             |
| A_23_P93311  | 780       | DDR1         | 1  | 0.1805      | -1.146       |             |
| A_23_P320290 | 152485    | ZNF827       | 1  | 0.64265     | 0.235        |             |
| A_23_P115636 | 1787      | TRDMT1       | -1 | -1.1535     | -0.688       |             |
| A_24_P216421 | 1838      | DTNB         | 1  | 0.269       | -0.461       |             |
| A_23_P216596 | 79987     | SVEP1        | -1 | 2.99725     | 3.781        |             |
| A_32_P196483 | 6189      | RPS3A        | 1  | -0.122      | -0.672       |             |
| A_23_P141770 | 8774      | NAPG         | -1 | -0.695      | -0.15        |             |
| A_23_P22660  | 10800     | CYSLTR1      | -1 | 0.249       | 0.747        |             |
| A_23_P57323  | 2078      | ERG          | -1 | 2.5155      | 3.041        |             |
| A_23_P138308 | 965       | CD58         | -1 | -0.4685     | 0.106        |             |
| A_23_P95640  | 440712    | C1orf186     |    | -1          | 1.4355       | 2.727       |
| A_32_P125832 | 100128893 | LOC100128893 |    | -1          | -0.0575      | 0.555       |
| A_32_P208120 | 57118     | CAMK1D       | -1 | 0.3305      | 0.771        |             |
| A_23_P83493  | 51115     | FAM82B       | -1 | -1.495      | -0.825       |             |
| A_24_P848662 | NA        | NA           | 1  | 1.4635      | 0.283        |             |
| A_23_P110961 | 51660     | BRP44L       | -1 | 0.9035      | 1.282        |             |
| A_23_P33433  | 4150      | MAZ          | 1  | -0.83975    |              | -1.354      |
| A_23_P57497  | 4627      | MYH9         | 1  | 0.3995      | -0.033       |             |
| A_23_P342825 | 6468      | FBXW4        | 1  | 1.0155      | 0.505        |             |
| A_23_P152858 | 55352     | C17orf79     |    | -1          | 0.2005       | 1.06555     |
| A_24_P304581 | 122553    | TRAPPC6B     |    | -1          | -0.6905      | -0.144      |
| A_24_P44341  | 55757     | UGGT2        | -1 | -1.1305     | -0.701       |             |
| A_23_P28815  | 1591      | CYP24A1      | 1  | -2.107      | -2.947444444 |             |
| A_23_P103601 | 57134     | MAN1C1       | -1 | 1.4475      | 1.987        |             |
| A_23_P217820 | 1718      | DHCR24       | 1  | -0.769      | -1.304       |             |
| A_24_P313186 | 801       | CALM1        | -1 | 1.384       | 2.418        |             |
| A_24_P320124 | 4889      | NPY5R        | -1 | 2.982       | 4.453        |             |

Suppl emental Tabl e1

|              |           |              |    |             |              |         |       |
|--------------|-----------|--------------|----|-------------|--------------|---------|-------|
| A_23_P34644  | 2213      | FCGR2B       | -1 | 2.9855      | 4.701        |         |       |
| A_23_P142688 | 79137     | FAM134A      | 1  | 0.12325     | -0.692       |         |       |
| A_24_P402825 | 55799     | CACNA2D3     |    | -1          | -0.565       | 0.222   |       |
| A_23_P2661   | 5908      | RAP1B        | -1 | 0.139       | 1.069        |         |       |
| A_24_P79591  | 11079     | RER1         | 1  | 0.2345      | -0.148       |         |       |
| A_24_P243749 | 5166      | PDK4         | -1 | 3.67935     | 5.027        |         |       |
| A_23_P390677 | 2122      | MECOM        | -1 | 1.1515      | 2.205        |         |       |
| A_23_P166491 | 27352     | SGSM3        | 1  | 0.3545      | -0.388       |         |       |
| A_23_P125771 | 3054      | HCFC1        | 1  | -0.91425    |              | -1.436  |       |
| A_24_P337810 | NA        | NA           | -1 | 0.5845      | 0.9985       |         |       |
| A_23_P75811  | NA        | NA           | 1  | -1.129      | -1.773       |         |       |
| A_23_P20183  | 51024     | FIS1         | -1 | 0.371       | 0.813        |         |       |
| A_23_P137403 | 10489     | LRRC41       | 1  | -0.0535     | -0.602       |         |       |
| A_23_P153351 | 645       | BLVRB        | -1 | 0.08        | 0.708        |         |       |
| A_23_P362759 | 11107     | PRDM5        | -1 | 0.125       | 0.785        |         |       |
| A_23_P17739  | 7625      | ZNF74        | 1  | -0.916      | -1.497       |         |       |
| A_24_P42330  | 100506930 | LOC100506930 | 1  |             |              | 0.848   | 0.386 |
| A_23_P169331 | 7186      | TRAF2        | 1  | -0.9635     | -1.549       |         |       |
| A_23_P136413 | 4326      | MMP17        | 1  | 0.657       | 0.156        |         |       |
| A_23_P14284  | 10490     | VTI1B        | -1 | 0.528166667 |              | 1.088   |       |
| A_23_P2967   | 8906      | AP1G2        | 1  | -0.24505    |              | -0.861  |       |
| A_23_P156443 | 3841      | KPNA5        | -1 | 0.055       | 0.522        |         |       |
| A_23_P101707 | 10226     | PLIN3        | 1  | -0.32025    |              | -0.9345 |       |
| A_23_P161686 | 9743      | ARHGAP32     | 1  |             | 0.86125      | 0.079   |       |
| A_23_P115417 | 23179     | RGL1         | -1 | 1.70725     | 2.2985       |         |       |
| A_32_P135818 | 6189      | RPS3A        | 1  | 0.2435      | -0.621       |         |       |
| A_23_P15135  | 84891     | ZSCAN10      | 1  | 1.722       | 0.453        |         |       |
| A_32_P160254 | NA        | NA           | 1  | 1.7565      | 0.419222222  |         |       |
| A_23_P381577 | 219749    | ZNF25        | -1 | 1.9715      | 2.455        |         |       |
| A_23_P253068 | 29882     | ANAPC2       | 1  | -0.055      | -0.588       |         |       |
| A_23_P118615 | 10351     | ABCA8        | -1 | 3.6625      | 4.399        |         |       |
| A_23_P300484 | 23363     | OBSL1        | 1  | 0.003       | -0.606       |         |       |
| A_23_P97481  | 79739     | TTLL7        | -1 | -0.818      | -0.032       |         |       |
| A_23_P66110  | 7249      | TSC2         | 1  | 0.4440625   |              | -0.056  |       |
| A_32_P161166 | 6134      | RPL10        | 1  | 0.002       | -0.407       |         |       |
| A_23_P311192 | 10558     | SPTLC1       | -1 | -0.9822     | -0.261       |         |       |
| A_23_P258377 | 23085     | ERC1         | -1 | -0.573      | -0.052       |         |       |
| A_23_P111835 | 1738      | DLD          | -1 | -0.6931     | 0.345        |         |       |
| A_23_P64617  | 8322      | FZD4         | -1 | 3.5115      | 4.197        |         |       |
| A_24_P467358 | 1937      | EEF1G        | 1  | -0.02       | -0.867555556 |         |       |
| A_23_P111311 | 9590      | AKAP12       | -1 | 1.0145      | 1.936        |         |       |
| A_24_P358462 | 375790    | AGRN         | 1  | -0.288      | -1.255       |         |       |
| A_23_P55251  | 3675      | ITGA3        | 1  | -0.91575    |              | -1.656  |       |
| A_24_P84220  | NA        | NA           | -1 | 0.671       | 0.869        |         |       |
| A_23_P18123  | 22871     | NLGN1        | -1 | -0.4685     | 0.350444444  |         |       |
| A_23_P305981 | 388152    | LOC388152    | 1  |             | -1.0775      | -2.011  |       |
| A_23_P49546  | 2905      | GRI N2C      | -1 | 0.238       | 0.975        |         |       |
| A_23_P110266 | 79625     | NDNF         | -1 | 0.602       | 1.355        |         |       |
| A_24_P56689  | 7755      | ZNF205       | 1  | 1.1245      | 0.357        |         |       |
| A_32_P225816 | 63976     | PRDM16       | -1 | 1.49675     | 2.007        |         |       |
| A_24_P926125 | 390705    | LOC390705    | 1  |             | 0.01275      | -0.875  |       |
| A_23_P335661 | 23034     | SAMD4A       | -1 | 1.411       | 2.467        |         |       |
| A_23_P313476 | 84498     | FAM120B      | 1  | 0.2425      | -0.361       |         |       |
| A_23_P323094 | 1911      | PHC1         | 1  | -0.681      | -1.307       |         |       |
| A_24_P201919 | 55333     | SYNJ2BP      | -1 | -0.04       | 0.401        |         |       |
| A_24_P394047 | 57404     | CYP20A1      | -1 | -0.45975    |              | 0.131   |       |
| A_24_P248240 | 23208     | SYT11        | -1 | 0.569       | 0.949        |         |       |
| A_23_P73114  | 5627      | PROS1        | -1 | 0.932       | 1.419        |         |       |
| A_23_P63660  | 84293     | C10orf58     | -1 | -1          | 1.95         | 2.718   |       |
| A_23_P147826 | 57826     | RAP2C        | -1 | -1.079      | -0.609       |         |       |
| A_23_P25913  | 83544     | DNAL1        | -1 | -1.0735     | -0.3965      |         |       |
| A_23_P20722  | 6621      | SNAPC4       | 1  | 0.044       | -0.595       |         |       |
| A_24_P401645 | 11154     | AP4S1        | -1 | -0.663      | -0.283       |         |       |

Suppl emental Tabl e1

|              |        |            |    |          |              |        |
|--------------|--------|------------|----|----------|--------------|--------|
| A_23_P60047  | 6867   | TACC1      | -1 | 1.6865   | 2.3155       |        |
| A_24_P915692 | 22822  | PHLDA1     | 1  | -0.9645  | -1.542       |        |
| A_32_P23795  | NA     | NA         | -1 | 0.308    | 1.076        |        |
| A_24_P375609 | 1984   | EI F5A     | 1  | -1.2135  | -1.63        |        |
| A_23_P83098  | 216    | ALDH1A1    | -1 | 1.9755   | 2.876        |        |
| A_23_P108143 | 2593   | GAMT       | 1  | -0.3195  | -0.881       |        |
| A_24_P233570 | 5689   | PSMB1      | -1 | -0.2525  | 0.213        |        |
| A_23_P167812 | 221662 | RBM24      | -1 | -1.4935  | -0.9415      |        |
| A_23_P216935 | 81571  | MI R600HG  |    | 1        | -0.5235      | -0.964 |
| A_24_P139993 | 843    | CASP10     | -1 | 0.1285   | 0.764        |        |
| A_23_P94800  | 6275   | S100A4     | -1 | 0.199    | 1.33         |        |
| A_24_P323084 | 284185 | LI NC00482 |    | -1       | -0.247       | 0.506  |
| A_23_P207299 | 51136  | RNFT1      | -1 | 0.221    | 0.679        |        |
| A_23_P219161 | 10439  | OLFM1      | -1 | 0.1505   | 0.6809       |        |
| A_24_P406301 | 4708   | NDUFB2     | -1 | -0.128   | 0.341333333  |        |
| A_23_P156531 | 5689   | PSMB1      | -1 | -0.4535  | -0.089       |        |
| A_32_P112380 | 284114 | TMEM102    | 1  | 0.109    | -0.593       |        |
| A_23_P94889  | 51115  | FAM82B     | -1 | 0.6065   | 1.038        |        |
| A_32_P50834  | 1730   | DI APH2    | -1 | 1.0435   | 1.658        |        |
| A_32_P39394  | 169792 | GLI S3     | -1 | -0.102   | 0.7115       |        |
| A_24_P343255 | 116138 | KLHDC3     | 1  | -0.177   | -0.7522      |        |
| A_23_P153390 | 339390 | CLEC4G     | -1 | 1.777    | 3.199        |        |
| A_23_P253932 | 55179  | FAIM       | -1 | 0.617    | 1.149        |        |
| A_24_P203953 | 439951 | LOC439951  |    | 1        | 1.7185       | 0.574  |
| A_24_P129813 | 6601   | SMARCC2    | 1  | 1.6845   | 0.758        |        |
| A_24_P149124 | 9315   | C5orf13    | 1  | -0.7685  | -1.167       |        |
| A_23_P8139   | 7629   | ZNF76      | 1  | 0.292    | -0.038       |        |
| A_23_P339119 | 79611  | ACSS3      | -1 | 0.1625   | 0.89         |        |
| A_23_P82047  | 134957 | STXBP5     | -1 | -1.1415  | -0.618       |        |
| A_23_P74852  | 5279   | PI GC      | -1 | 1.193    | 1.865        |        |
| A_23_P340848 | 5739   | PTGI R     | -1 | 1.033    | 2.209        |        |
| A_24_P84045  | 256355 | RPS2P32    | 1  | -0.8056  | -1.507       |        |
| A_23_P393401 | 339044 | PKD1P1     | 1  | 0.1965   | -0.464       |        |
| A_24_P64781  | 4254   | KITLG      | -1 | -0.20525 |              | 0.224  |
| A_24_P7085   | 118432 | RPL29P2    | 1  | -0.1635  | -0.515       |        |
| A_24_P285158 | 127943 | FCRLB      | 1  | 1.743    | 0.499        |        |
| A_24_P244575 | 53373  | TPCN1      | 1  | 0.1155   | -0.232       |        |
| A_23_P377376 | 10097  | ACTR2      | -1 | -0.7525  | -0.109666667 |        |
| A_23_P39525  | 79843  | FAM124B    | -1 | 1.2865   | 1.9625       |        |
| A_23_P429461 | 197258 | FUK        | 1  | 0.4615   | -0.091       |        |
| A_23_P138461 | 56652  | C10orf2    | 1  | -1.554   | -2.031       |        |
| A_32_P203585 | 23492  | CBX7       | 1  | 1.652    | 0.446        |        |
| A_23_P253963 | 54968  | TMEM70     | -1 | -0.9427  | -0.345       |        |
| A_23_P93027  | 8817   | FGF18      | -1 | 0.07225  | 1.05         |        |
| A_23_P124384 | 6474   | SHOX2      | -1 | 0.20225  | 0.841        |        |
| A_23_P75283  | 5950   | RBP4       | -1 | 1.821    | 2.806        |        |
| A_23_P385851 | 55796  | MBNL3      | -1 | -1.8355  | -0.9911      |        |
| A_23_P121545 | 2823   | GPM6A      | -1 | 0.63675  | 1.691        |        |
| A_24_P208721 | 23276  | KLHL18     | 1  | 0.296    | -0.138111111 |        |
| A_24_P255338 | 9632   | SEC24C     | 1  | -0.4925  | -0.994       |        |
| A_23_P139228 | 23647  | ARFI P2    | 1  | 0.128    | -0.452       |        |
| A_23_P343837 | 57097  | PARP11     | -1 | 0.408    | 0.816        |        |
| A_23_P24884  | 6764   | ST5        | 1  | 1.4485   | 0.695        |        |
| A_23_P5163   | 57130  | ATP13A1    | 1  | -0.39775 |              | -0.909 |
| A_23_P16078  | 5050   | PAFAH1B3   |    | 1        | -1.2235      | -2.251 |
| A_23_P302672 | 115265 | DDI T4L    | -1 | 2.38865  | 3.181        |        |
| A_23_P112251 | 2790   | GNG10      | -1 | 0.0245   | 0.865        |        |
| A_24_P417189 | 1852   | DUSP9      | 1  | -1.4945  | -2.198       |        |
| A_24_P379413 | 3570   | IL6R       | -1 | 0.7255   | 1.214        |        |
| A_32_P83256  | 11213  | IRAK3      | -1 | 2.479    | 3.612        |        |
| A_23_P16214  | 84261  | FBXW9      | 1  | -0.133   | -0.857       |        |
| A_24_P257579 | 64097  | EPB41L4A   |    | -1       | 2.788285714  | 3.382  |
| A_24_P100368 | 6990   | DYNLT3     | -1 | -1.5765  | -0.837       |        |

Suppl emental Tabl e1

|              |        |           |    |           |              |         |
|--------------|--------|-----------|----|-----------|--------------|---------|
| A_32_P43436  | 6159   | RPL29     | 1  | 0.0835    | -0.408       |         |
| A_24_P28739  | 55704  | CCDC88A   | -1 | -1.778    | -0.886       |         |
| A_32_P31771  | 80856  | KIAA1715  |    | -1        | -1.5265      | -0.418  |
| A_23_P170498 | 123803 | NTAN1     | -1 | 0.137     | 0.774        |         |
| A_23_P216889 | 441430 | ANKRD20A2 |    | -1        | 0.244        | 1.017   |
| A_23_P43484  | 1029   | CDKN2A    | -1 | -1.915    | -0.75        |         |
| A_23_P157136 | 85477  | SCIN      | -1 | 2.73725   | 3.1467       |         |
| A_24_P221424 | 147808 | ZNF784    | 1  | 0.9135    | 0.117        |         |
| A_24_P248053 | 116447 | TOP1MT    | 1  | -0.386    | -0.869       |         |
| A_23_P401472 | 1131   | CHRM3     | 1  | -1.16875  |              | -1.9315 |
| A_24_P410809 | 9736   | USP34     | -1 | -0.3105   | 0.3905       |         |
| A_24_P219785 | 808    | CALM3     | -1 | -0.77025  |              | -0.234  |
| A_23_P360179 | 84461  | NEURL4    | 1  | 0.3215    | -0.083       |         |
| A_23_P417113 | 155435 | RBM33     | -1 | -1.4285   | -0.832       |         |
| A_23_P103571 | 10905  | MAN1A2    | -1 | -0.0645   | 0.363        |         |
| A_23_P10785  | 143187 | VTI1A     | -1 | -0.4595   | 0.209        |         |
| A_32_P150300 | NA     | NA        | -1 | 1.8715    | 3.073        |         |
| A_32_P221552 | 80267  | EDEM3     | -1 | -0.3345   | 0.074        |         |
| A_24_P235429 | 19     | ABCA1     | -1 | 1.415     | 2.699        |         |
| A_24_P272594 | 23005  | MAPKBP1   | 1  | 1.374     | 0.598        |         |
| A_24_P187218 | 5101   | PCDH9     | -1 | 1.847     | 3.393        |         |
| A_23_P64919  | 79785  | RERGL     | -1 | 3.0797    | 3.834        |         |
| A_23_P39647  | 6508   | SLC4A3    | 1  | 0.6221    | 0.053        |         |
| A_24_P166434 | 170680 | PSORS1C2  |    | 1         | 1.537        | 0.6485  |
| A_23_P357811 | 4154   | MBNL1     | -1 | 1.145     | 1.529        |         |
| A_23_P149975 | 83641  | FAM107B   | -1 | 0.9835    | 1.803        |         |
| A_24_P365025 | 9043   | SPAG9     | -1 | -0.7105   | -0.201       |         |
| A_23_P88589  | 7026   | NR2F2     | -1 | 0.5365    | 0.919        |         |
| A_24_P139899 | 23208  | SYT11     | -1 | 0.229     | 0.7922       |         |
| A_23_P217384 | 8905   | AP1S2     | -1 | -0.5255   | 0.195        |         |
| A_23_P203920 | 8082   | SSPN      | -1 | 3.3745    | 3.796        |         |
| A_23_P211910 | 5352   | PLOD2     | -1 | -0.4965   | 0.43         |         |
| A_23_P502269 | 84271  | POLDI P3  | 1  | 0.36525   | -0.245       |         |
| A_23_P7503   | 91937  | TIMD4     | -1 | 0.170925  |              | 1.634   |
| A_23_P383532 | 54928  | IMPAD1    | -1 | -0.3545   | 0.188        |         |
| A_23_P17224  | 130026 | ICAI1L    | -1 | 0.871     | 1.2469       |         |
| A_23_P404259 | 493869 | GPX8      | -1 | -1.6465   | -1.120888889 |         |
| A_24_P152649 | 644189 | LOC644189 |    | -1        | 1.167        | 1.9375  |
| A_23_P209408 | 843    | CASP10    | -1 | 0.3755    | 1.091        |         |
| A_23_P94230  | 23643  | LY96      | -1 | -0.41925  |              | 0.324   |
| A_24_P118531 | 5908   | RAP1B     | -1 | -0.2715   | 0.538        |         |
| A_23_P88411  | 6400   | SEL1L     | -1 | 0.8       | 1.245        |         |
| A_32_P44274  | 63922  | CHTF18    | 1  | -1.3345   | -2.018       |         |
| A_24_P62708  | 5567   | PRKACB    | -1 | 0.5845    | 1.085        |         |
| A_23_P374695 | 7010   | TEK       | -1 | 3.581     | 3.963        |         |
| A_23_P70318  | 22875  | ENPP4     | -1 | 1.7875    | 2.746        |         |
| A_24_P112395 | 64081  | PBLD      | -1 | 1.872     | 2.3105       |         |
| A_23_P116114 | 5140   | PDE3B     | -1 | 1.9955    | 2.843        |         |
| A_24_P328333 | 9475   | ROCK2     | -1 | 0.4665    | 1.018        |         |
| A_23_P119526 | 8943   | AP3D1     | 1  | -0.6015   | -0.897       |         |
| A_23_P306804 | 163732 | CITED4    | 1  | 1.6313125 |              | 0.495   |
| A_23_P158533 | 10522  | DEAF1     | 1  | -0.202    | -0.72        |         |
| A_23_P216023 | 284    | ANGPT1    | -1 | 1.1755    | 2.98         |         |
| A_24_P55465  | 136319 | MTPN      | -1 | -0.839    | -0.219       |         |
| A_23_P40354  | 22919  | MAPRE1    | -1 | -0.81625  |              | 0.012   |
| A_23_P372096 | 140688 | C20orf112 |    | 1         | -0.54225     | -1.042  |
| A_23_P357248 | 79175  | ZNF343    | -1 | -0.261    | 0.334        |         |
| A_24_P46946  | 64321  | SOX17     | 1  | 1.67165   | 0.956        |         |
| A_24_P73599  | 3603   | IL16      | -1 | 1.544     | 2.064        |         |
| A_23_P168443 | 2050   | EPHB4     | 1  | -0.2905   | -0.855       |         |
| A_23_P164451 | 6909   | TBX2      | -1 | -0.764    | -0.504       |         |
| A_24_P68585  | 6464   | SHC1      | 1  | -0.21     | -0.69        |         |
| A_23_P15654  | 9618   | TRAF4     | 1  | -0.097    | -1.673       |         |

Suppl emental Tabl e1

|              |        |          |    |              |              |         |
|--------------|--------|----------|----|--------------|--------------|---------|
| A_23_P205746 | 2009   | EML1     | -1 | -0.279       | 0.255        |         |
| A_23_P381505 | 221806 | VWDE     | 1  | -1.2445      | -1.68        |         |
| A_24_P333364 | 116988 | AGAP3    | 1  | 1.6595       | 0.469        |         |
| A_24_P295245 | 444    | ASPH     | -1 | 1.3835       | 1.713        |         |
| A_23_P71464  | 1666   | DECR1    | -1 | 1.0135       | 1.372        |         |
| A_24_P20120  | 55704  | CCDC88A  | -1 | -1.031       | -0.3528      |         |
| A_23_P25403  | 29915  | HCFC2    | -1 | 0.3605       | 1.156        |         |
| A_23_P501822 | 3728   | JUP      | 1  | 0.70525      | -0.0645      |         |
| A_23_P43679  | 114991 | ZNF618   | 1  | 1.0075       | 0.452        |         |
| A_23_P19691  | 23593  | HEBP2    | -1 | 1.668        | 2.092        |         |
| A_23_P119130 | 6223   | RPS19    | 1  | -0.397       | -1.092       |         |
| A_23_P88184  | 55727  | BTBD7    | -1 | 0.17         | 0.679        |         |
| A_23_P58815  | 26272  | FBX04    | -1 | -0.26375     |              | 0.433   |
| A_23_P312652 | 1153   | CIRBP    | 1  | 1.7855       | 1.26         |         |
| A_23_P17444  | 83541  | FAM110A  | 1  | 0.107        | -0.299       |         |
| A_24_P418408 | 375061 | FAM89A   | -1 | 2.0455       | 2.422        |         |
| A_23_P7325   | 683    | BST1     | -1 | 1.8625       | 2.867        |         |
| A_23_P141699 | 84552  | PARD6G   | 1  | 1.7425       | 0.778        |         |
| A_23_P103256 | 10878  | CFHR3    | -1 | 2.1285       | 3.408        |         |
| A_23_P413721 | 2819   | GPD1     | -1 | 3.455        | 4.021        |         |
| A_32_P130630 | 9194   | SLC16A7  | -1 | 1.257        | 2.163        |         |
| A_23_P119907 | 55139  | ANKZF1   | 1  | -0.7605      | -1.235       |         |
| A_23_P164436 | 443    | ASPA     | -1 | 3.73         | 4.7075       |         |
| A_23_P133665 | 2444   | FRK      | -1 | -0.229       | 0.181        |         |
| A_32_P204019 | 6159   | RPL29    | 1  | 0.041        | -0.412       |         |
| A_23_P420981 | 122616 | C14orf79 | 1  |              | 0.3875       | -0.7745 |
| A_23_P32722  | 79797  | ZNF408   | 1  | -0.40625     |              | -0.97   |
| A_23_P44466  | 79839  | CCDC102B | -1 |              | 2.7021       | 3.47    |
| A_23_P81581  | 635    | BHMT     | -1 | -0.9475      | 0.182        |         |
| A_24_P322353 | 9050   | PSTPI P2 | 1  | 0.6175       | -0.054       |         |
| A_23_P82839  | 137964 | AGPAT6   | 1  | -0.637       | -1.165       |         |
| A_23_P40049  | 790    | CAD      | 1  | -0.960055556 |              | -1.541  |
| A_24_P50890  | 5818   | PVRL1    | 1  | 0.6045       | -0.599       |         |
| A_23_P23572  | 8394   | PI P5K1A | 1  | -0.544       | -1.083       |         |
| A_24_P207091 | 55147  | RBM23    | 1  | -0.0165      | -0.548       |         |
| A_23_P130455 | 7593   | MZF1     | 1  | 0.6805       | 0.056        |         |
| A_23_P120270 | 90411  | MCFD2    | -1 | -1.821       | -1.088       |         |
| A_23_P3413   | 161725 | OTUD7A   | 1  | 1.4835       | 0.6135       |         |
| A_23_P121037 | 50512  | PODXL2   | 1  | -1.2915      | -2.019       |         |
| A_24_P280497 | 57666  | FBRSL1   | 1  | 1.566        | 0.159        |         |
| A_24_P173088 | 6776   | STAT5A   | 1  | 0.704        | 0.1908       |         |
| A_24_P31235  | 1984   | EI F5A   | 1  | -1.3         | -1.614       |         |
| A_23_P141917 | 7297   | TYK2     | 1  | -0.5765      | -1.142333333 |         |
| A_23_P29816  | 51365  | PLA1A    | -1 | -0.998       | -0.294       |         |
| A_24_P273972 | 3075   | CFH      | -1 | 1.443        | 2.966        |         |
| A_23_P61426  | 4482   | MSRA     | -1 | 1.27         | 1.789        |         |
| A_23_P160286 | 10216  | PRG4     | -1 | 0.26375      | 3.792        |         |
